# Supplementary material for: TT3D: Leveraging precomputed protein 3D sequence models to predict protein–protein interactions
Source: PubMed Central journal article supplement (PMC10640393; doi:10.1093/bioinformatics/btad663), 2023-10-28
Supplement: btad663_supplementary_data.pdf [file btad663_supplementary_data.pdf]

## Supplementary Materials

### Comparison of TT3D to annotation-transfer techniques

To investigate the performance of homology-only mapping on protein-protein interaction, we identified sequence- and structure-based homologs in fly and yeast. To determine sequence homologs, We used Ensembl-provided homology mappings. We originally considered, but then rejected the use of only one-to-one mappings, i.e., where a single fly protein is mapped to just one human protein, which yielded only 68 mappings between human and fly PPIs. Our subsequent analyses therefore were in the many-to-many homology mapping regime. To determine structure homologs, we used structures from AlphaFold DB, obtained the 3Di sequence representations from Foldseek, and then applied MMSeqs2 (with an e-value threshold of  $10^{-10}$ ) to map structural homologs between fly (or yeast) and human.

We took the entire set of human PPIs from our training set and mapped them to all potential fly (or yeast) homolog pairs, reasoning that this would be the exhaustive set of potential fly PPIs that any annotation transfer method could potentially consider as true. We note that this mapping resulted in a massive expansion of potential fly PPIs. The  $\sim 38,000$  human training-set PPIs were mapped to  $\sim 180,000$  fly PPIs (Ensembl-based homology mapping) and  $\sim 3.1$  million fly PPIs (structure-based homology mapping). We considered the union of these with fly pairs with the true positive fly pairs ( $\sim 27,000$  from STRING v11; physical binding interactions only). We created analogous networks for yeast, observing that the set of homologs between human and yeast is smaller. Because of distinct sequence and structure-based homology mapping schemes, these evaluations were essentially on two separate datasets, which we denote as “Networks from Sequence Homology” and “Networks from Structure Homology”, respectively.

We applied TT3D on these datasets, computing its precision and recall curves. For homology-based annotation transfer, precision was computed as standard:  $\text{Intersection}(\text{True\_Positives}, \text{Predicted\_Positives}) / \text{Predicted\_Positives}$ . Here, *True\_Positives* are the ground-truth fly PPIs while *Predicted\_Positives* is the set of PPIs mapped from human. Recall was similarly computed as per its standard definition. We note that annotation transfer provides only one set of precision and recall scores, while TT3D’s score (in the range 0–1) can be thresholded to provide a range of precision-at-desired-recall scores and the corresponding Areas Under Precision-Recall Curve.

| Experiment                       | Species | Predictions By | Recall | Precision | AUPR   |
|----------------------------------|---------|----------------|--------|-----------|--------|
| -                                | Fly     | TT3D           | -      | -         | 0.6263 |
| -                                | Yeast   | TT3D           | -      | -         | 0.4755 |
| Homology Only                    | Fly     | Sequence       | 0.658  | 0.2065    | -      |
| Homology Only                    | Fly     | Structure      | 0.7864 | 0.2967    | -      |
| Homology Only                    | Yeast   | Sequence       | 0.4442 | 0.2312    | -      |
| Homology Only                    | Yeast   | Structure      | 0.8438 | 0.1386    | -      |
| Homology+Interaction in Human    | Fly     | Sequence       | 0.384  | 0.99      | -      |
| Homology+Interaction in Human    | Fly     | Structure      | 0.6396 | 0.7894    | -      |
| Homology+Interaction in Human    | Yeast   | Sequence       | 0.1922 | 0.9688    | -      |
| Homology+Interaction in Human    | Yeast   | Structure      | 0.5126 | 0.4879    | -      |
| Networks from Sequence Homology  | Fly     | TT3D           | 0.3858 | 0.2934    | 0.2812 |
| Networks from Sequence Homology  | Fly     | Sequence       | 0.3858 | 0.0598    | -      |
| Networks from Sequence Homology  | Yeast   | TT3D           | 0.1917 | 0.6913    | 0.7409 |
| Networks from Sequence Homology  | Yeast   | Sequence       | 0.1917 | 0.4025    | -      |
| Networks from Structure Homology | Fly     | TT3D           | 0.6452 | 0.0604    | 0.0759 |
| Networks from Structure Homology | Fly     | Structure      | 0.6452 | 0.0056    | -      |
| Networks from Structure Homology | Yeast   | TT3D           | 0.5397 | 0.0856    | 0.0583 |
| Networks from Structure Homology | Yeast   | Structure      | 0.5397 | 0.0131    | -      |
